# Supplementary material
Source: Copernicus journal article supplement (doi:10.5194/egusphere-2026-2347)
Supplement: Supplementary file 1 [file egusphere-2026-2347-supplement.pdf]

# Supplementary files

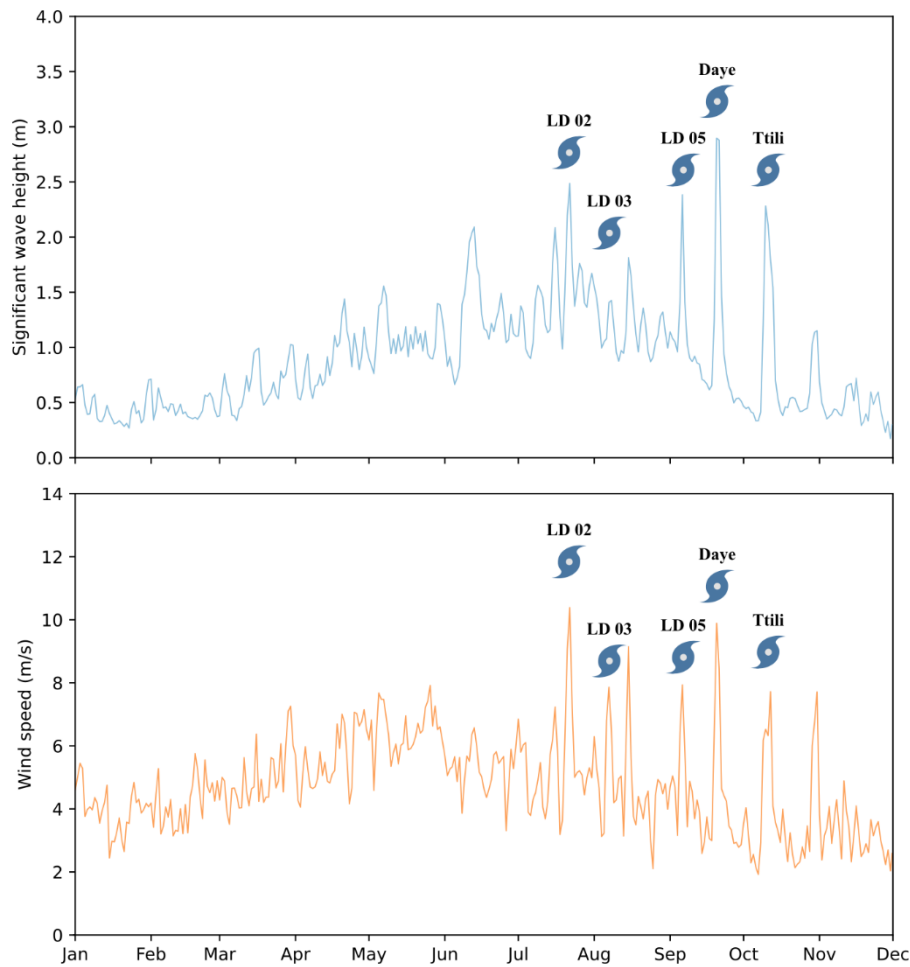

**Supplementary figure 1:**

**Significant wave height(m) and Wind speed(m/s) graphs of the study area for the year 2018, from ERA5 dataset (Hersbach et al., 2020). Tropical storm Daye and a Category three cyclone Titli, along with three deep depressions, Land Depression 02, 03, and 05, as named by the IMD are also marked.**

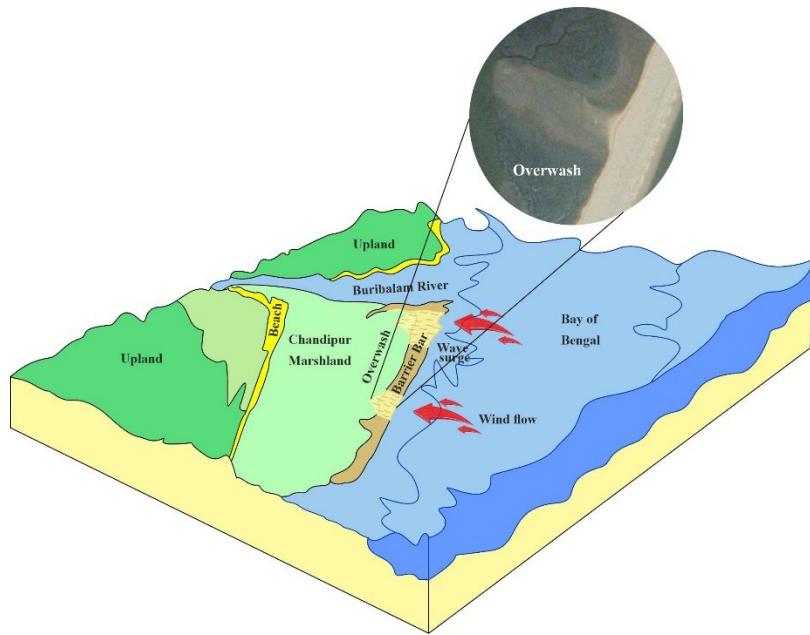

**Supplementary figure 2:**

The provided schematic diagram shows the washover deposits in the Chandipur region. The impact of the storm surge resulting from the catastrophic events results in the transportation of nearshore sediments during the occurrence of tropical storms in the Bay of Bengal.
